# Supplementary material for: Influence of the protonation of pyridine nitrogen on pnicogen bonding: competition and cooperativity
Source: Royal Society of Chemistry journal article supplement (doi:10.1039/c6cp00551a), 2016-01-01
Supplement: c6cp00551a1.pdf [file c6cp00551a1.pdf]

## Supporting information

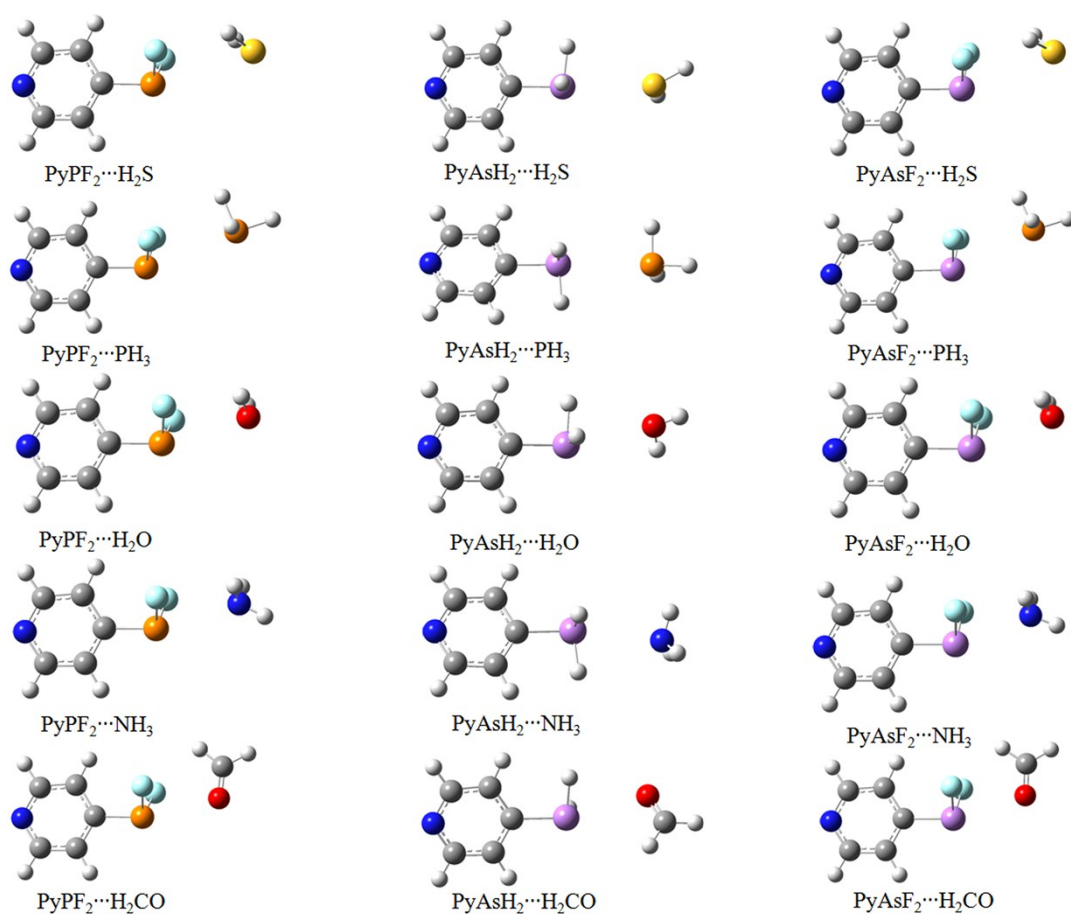

Fig. S1 Optimized structures of PyPF<sub>2</sub>, PyAsH<sub>2</sub>, and PyAsF<sub>2</sub> complexes with NH<sub>3</sub>, H<sub>2</sub>O, H<sub>2</sub>S, PH<sub>3</sub>, and H<sub>2</sub>CO.

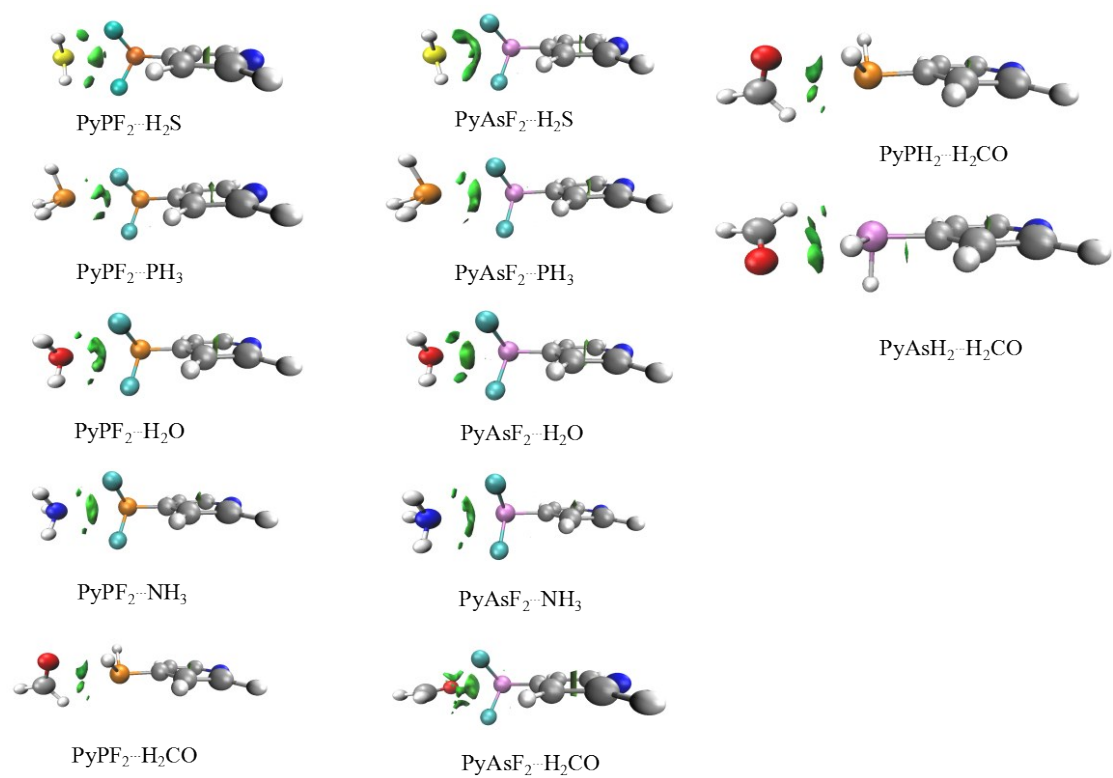

Fig. S2. Gradient isosurfaces of the complexes of PyPH<sub>2</sub>...H<sub>2</sub>CO, PyAsH<sub>2</sub>...H<sub>2</sub>CO, and those of PyZF<sub>2</sub> with H<sub>2</sub>O, NH<sub>3</sub>, H<sub>2</sub>S, PH<sub>3</sub>, and H<sub>2</sub>CO

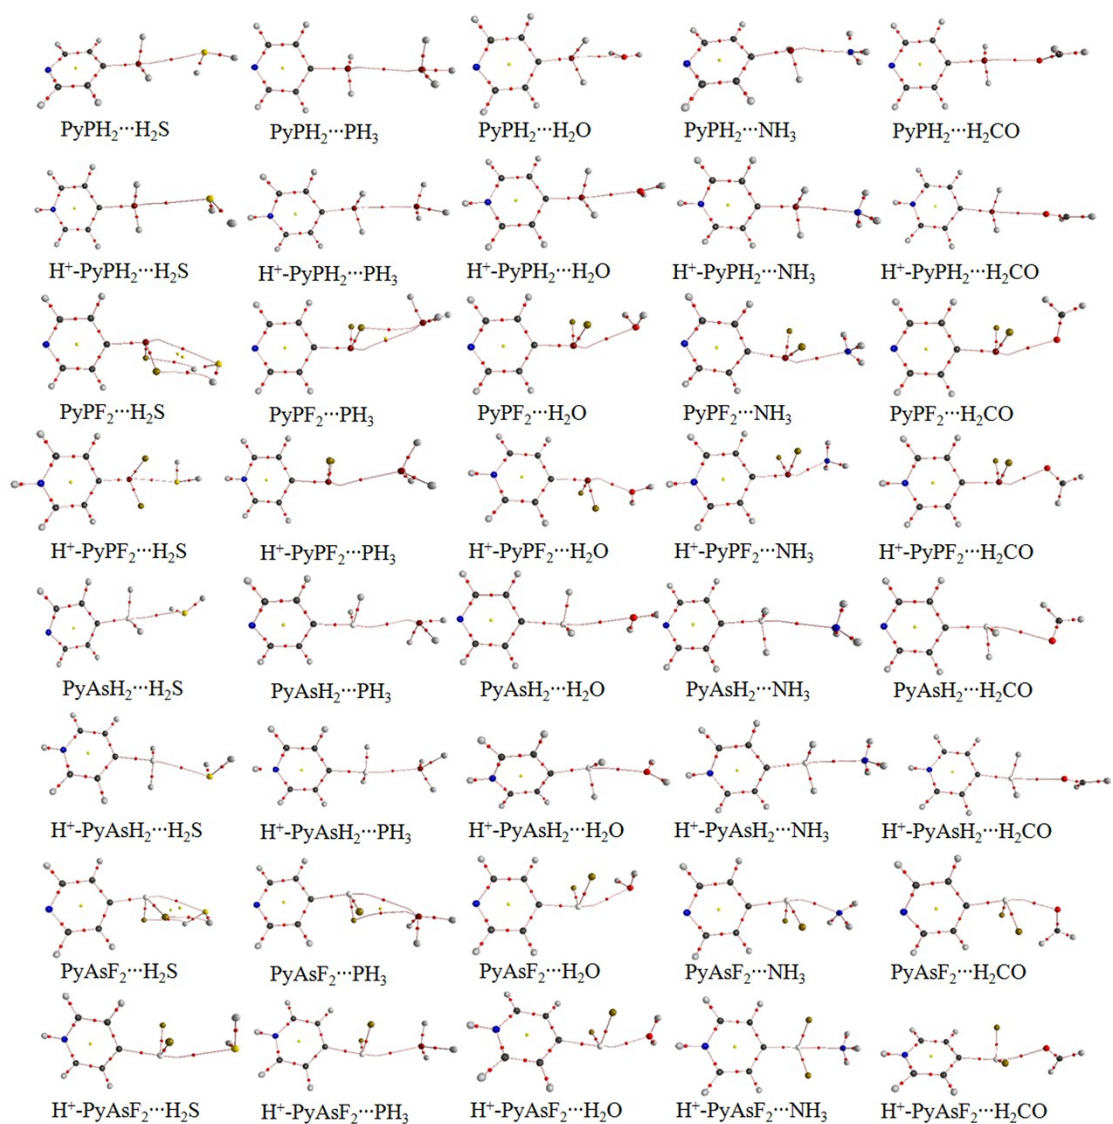

Fig. S3 Molecular maps of pnicogen-bonded complexes. The bond and ring critical points are represented by red and yellow points, respectively.

Table S1 Second-order perturbation energy ( $E^{(2)}$ , kJ/mol) of the weak secondary interaction in the complexes before and after the protonation on the N atom of pyridine.

| No protonation                        |           |                                      | protonation |                                      |
|---------------------------------------|-----------|--------------------------------------|-------------|--------------------------------------|
|                                       | $E^{(2)}$ | type                                 | $E^{(2)}$   | type                                 |
| PyPH <sub>2</sub> ⋯H <sub>2</sub> CO  | 1.8       | Lp <sub>P</sub> →BD* <sub>C-H</sub>  | 0.3         | Lp <sub>P</sub> →BD* <sub>C-O</sub>  |
| PyPF <sub>2</sub> ⋯H <sub>2</sub> S   | 1.7       | Lp <sub>F</sub> →BD* <sub>S-H</sub>  | 0.7         | Lp <sub>F</sub> →BD* <sub>S-H</sub>  |
| PyPF <sub>2</sub> ⋯PH <sub>3</sub>    | 4.4       | Lp <sub>F</sub> →BD* <sub>P-H</sub>  | 2.1         | Lp <sub>F</sub> →BD* <sub>P-H</sub>  |
| PyPF <sub>2</sub> ⋯H <sub>2</sub> O   | 0.2       | Lp <sub>F</sub> →BD* <sub>O-H</sub>  | 1.2         | Lp <sub>F</sub> →BD* <sub>O-H</sub>  |
| PyPF <sub>2</sub> ⋯NH <sub>3</sub>    | 1.5       | Lp <sub>F</sub> →BD* <sub>N-H</sub>  | 5.2         | Lp <sub>F</sub> →BD* <sub>N-H</sub>  |
| PyPF <sub>2</sub> ⋯H <sub>2</sub> CO  | 0.5       | Lp <sub>F</sub> →BD* <sub>C-H</sub>  | 2.0         | Lp <sub>F</sub> →BD* <sub>C-O</sub>  |
| PyAsH <sub>2</sub> ⋯H <sub>2</sub> CO | 1.0       | Lp <sub>As</sub> →BD* <sub>C-H</sub> | 0.4         | Lp <sub>As</sub> →BD* <sub>C-O</sub> |
| PyAsF <sub>2</sub> ⋯H <sub>2</sub> S  | 3.0       | Lp <sub>F</sub> →BD* <sub>S-H</sub>  | 0.8         | Lp <sub>F</sub> →BD* <sub>S-H</sub>  |
| PyAsF <sub>2</sub> ⋯PH <sub>3</sub>   | 5.6       | Lp <sub>F</sub> →BD* <sub>P-H</sub>  | 3.8         | Lp <sub>F</sub> →BD* <sub>P-H</sub>  |
| PyAsF <sub>2</sub> ⋯H <sub>2</sub> O  | 0.9       | Lp <sub>F</sub> →BD* <sub>O-H</sub>  | 1.4         | Lp <sub>F</sub> →BD* <sub>O-H</sub>  |
| PyAsF <sub>2</sub> ⋯NH <sub>3</sub>   | 2.0       | Lp <sub>F</sub> →BD* <sub>N-H</sub>  | 7.0         | Lp <sub>F</sub> →BD* <sub>N-H</sub>  |
| PyAsF <sub>2</sub> ⋯H <sub>2</sub> CO | 1.2       | Lp <sub>F</sub> →BD* <sub>C-H</sub>  | 2.3         | Lp <sub>F</sub> →BD* <sub>C-O</sub>  |

Table S2 Second-order perturbation energies ( $E^{(2)}$ , kJ/mol) of other important orbital interactions in the complexes before and after the protonation on the N atom of pyridine.

| No protonation                       |           |                                      | protonation |                                      |
|--------------------------------------|-----------|--------------------------------------|-------------|--------------------------------------|
|                                      | $E^{(2)}$ | type                                 | $E^{(2)}$   | type                                 |
| PyPH <sub>2</sub> ⋯H <sub>2</sub> S  | 3.4       | Lp <sub>P</sub> →BD* <sub>S-H</sub>  | 0.5         | Lp <sub>P</sub> →BD* <sub>S-H</sub>  |
| PyPH <sub>2</sub> ⋯PH <sub>3</sub>   | 7.5       | Lp <sub>P</sub> →BD* <sub>P-H</sub>  | 2.4         | Lp <sub>P</sub> →BD* <sub>P-H</sub>  |
| PyPH <sub>2</sub> ⋯H <sub>2</sub> O  | 2.0       | Lp <sub>P</sub> →BD* <sub>O-H</sub>  | 2.1         | Lp <sub>P</sub> →BD* <sub>O-H</sub>  |
| PyPH <sub>2</sub> ⋯NH <sub>3</sub>   | 1.9       | Lp <sub>P</sub> →BD* <sub>N-H</sub>  | 1.9         | Lp <sub>P</sub> →BD* <sub>N-H</sub>  |
| PyPF <sub>2</sub> ⋯PH <sub>3</sub>   | 3.4       | Lp <sub>P</sub> →BD* <sub>P-H</sub>  | 2.3         | Lp <sub>P</sub> →BD* <sub>P-H</sub>  |
| PyPF <sub>2</sub> ⋯NH <sub>3</sub>   | 0.5       | Lp <sub>P</sub> →BD* <sub>N-H</sub>  | 2.8         | Lp <sub>P</sub> →BD* <sub>N-H</sub>  |
| PyAsH <sub>2</sub> ⋯H <sub>2</sub> S | 3.6       | Lp <sub>As</sub> →BD* <sub>S-H</sub> | 0.4         | Lp <sub>As</sub> →BD* <sub>S-H</sub> |
| PyAsH <sub>2</sub> ⋯PH <sub>3</sub>  | 7.5       | Lp <sub>As</sub> →BD* <sub>P-H</sub> | 2.6         | Lp <sub>As</sub> →BD* <sub>P-H</sub> |
| PyAsH <sub>2</sub> ⋯H <sub>2</sub> O | 2.3       | Lp <sub>As</sub> →BD* <sub>O-H</sub> | 2.5         | Lp <sub>As</sub> →BD* <sub>O-H</sub> |
| PyAsH <sub>2</sub> ⋯NH <sub>3</sub>  | 1.8       | Lp <sub>As</sub> →BD* <sub>N-H</sub> | 1.9         | Lp <sub>As</sub> →BD* <sub>N-H</sub> |
| PyAsF <sub>2</sub> ⋯PH <sub>3</sub>  | 2.3       | Lp <sub>As</sub> →BD* <sub>P-H</sub> | 1.5         | Lp <sub>As</sub> →BD* <sub>P-H</sub> |
| PyAsF <sub>2</sub> ⋯NH <sub>3</sub>  | 1.0       | Lp <sub>As</sub> →BD* <sub>N-H</sub> | 1.7         | Lp <sub>As</sub> →BD* <sub>N-H</sub> |

Table S3 The most negative MEP ( $V_{\min}$ , kJ/mol) on the Lewis base atom in NH<sub>3</sub>, H<sub>2</sub>O, H<sub>2</sub>S, PH<sub>3</sub>, and H<sub>2</sub>CO as well as the most positive MEP ( $V_{\max}$ , kJ/mol) on the pnictogen atom in the protonated molecules

|                   | $V_{\min}$ |                                    | $V_{\max}$ |
|-------------------|------------|------------------------------------|------------|
| H <sub>2</sub> S  | -74.7      | H <sup>+</sup> -PyPH <sub>2</sub>  | 412.4      |
| PH <sub>3</sub>   | -77.6      | H <sup>+</sup> -PyPF <sub>2</sub>  | 428.8      |
| H <sub>2</sub> O  | -149.1     | H <sup>+</sup> -PyAsH <sub>2</sub> | 414.9      |
| NH <sub>3</sub>   | -165.5     | H <sup>+</sup> -PyAsF <sub>2</sub> | 445.6      |
| H <sub>2</sub> CO | -146.4     | ---                                | ---        |

Table S4 Exchange (EX) and repulsion (REP) contributions to the interaction energy in the complexes. All energies are in kJ/mol.

| Systems                               | EX            | REP          |
|---------------------------------------|---------------|--------------|
| PyPH <sub>2</sub> ⋯H <sub>2</sub> S   | -25.7(-40.6)  | 42.6(70.8)   |
| PyPH <sub>2</sub> ⋯PH <sub>3</sub>    | -34.2(-47.9)  | 56.3(82.9)   |
| PyPH <sub>2</sub> ⋯H <sub>2</sub> O   | -20.6(-36.7)  | 35.0(64.2)   |
| PyPH <sub>2</sub> ⋯NH <sub>3</sub>    | -32.7(-79.5)  | 54.0(141.0)  |
| PyPH <sub>2</sub> ⋯H <sub>2</sub> CO  | -33.8(-36.2)  | 56.7(63.6)   |
| PyPF <sub>2</sub> ⋯H <sub>2</sub> S   | -22.5(-57.8)  | 38.4(104.8)  |
| PyPF <sub>2</sub> ⋯PH <sub>3</sub>    | -21.5(-60.3)  | 36.4(109.3)  |
| PyPF <sub>2</sub> ⋯H <sub>2</sub> O   | -27.6(-49.3)  | 49.2(92.5)   |
| PyPF <sub>2</sub> ⋯NH <sub>3</sub>    | -47.0(-192.5) | 81.1(366.6)  |
| PyPF <sub>2</sub> ⋯H <sub>2</sub> CO  | -32.6(-74.1)  | 56.1(136.1)  |
| PyAsH <sub>2</sub> ⋯H <sub>2</sub> S  | -27.4 (-46.9) | 45.6(82.6)   |
| PyAsH <sub>2</sub> ⋯PH <sub>3</sub>   | -35.6(-56.4)  | 59.1(99.3)   |
| PyAsH <sub>2</sub> ⋯H <sub>2</sub> O  | -23.0(-44.4)  | 38.8(78.8)   |
| PyAsH <sub>2</sub> ⋯NH <sub>3</sub>   | -40.6(-96.2)  | 67.6(173.6)  |
| PyAsH <sub>2</sub> ⋯H <sub>2</sub> CO | -37.7(-45.1)  | 63.6(80.2)   |
| PyAsF <sub>2</sub> ⋯H <sub>2</sub> S  | -36.4(-79.8)  | 62.9(148.7)  |
| PyAsF <sub>2</sub> ⋯PH <sub>3</sub>   | -34.8(-90.2)  | 60.0(168.8)  |
| PyAsF <sub>2</sub> ⋯H <sub>2</sub> O  | -47.2(-84.7)  | 83.8(157.5)  |
| PyAsF <sub>2</sub> ⋯NH <sub>3</sub>   | -79.2(-245.7) | 140.8(482.6) |
| PyAsF <sub>2</sub> ⋯H <sub>2</sub> CO | -50.3(-94.1)  | 88.3(176.2)  |

Note: Data in parentheses are from the protonated complexes.

Table S5 Electron density ( $\rho$ , au), Laplacian ( $\nabla^2\rho$ , au), and energy density ( $H$ , au) at the intermolecular BCP in the protonated complexes

|                                                       | $\rho$         | $\nabla^2\rho$ | $H$     |
|-------------------------------------------------------|----------------|----------------|---------|
| H <sup>+</sup> -PyPH <sub>2</sub> ⋯H <sub>2</sub> S   | 0.0110(0.0032) | 0.0301         | 0.0007  |
| H <sup>+</sup> -PyPH <sub>2</sub> ⋯PH <sub>3</sub>    | 0.0116(0.0025) | 0.0274         | 0.0004  |
| H <sup>+</sup> -PyPH <sub>2</sub> ⋯H <sub>2</sub> O   | 0.0130(0.0051) | 0.0520         | 0.0018  |
| H <sup>+</sup> -PyPH <sub>2</sub> ⋯NH <sub>3</sub>    | 0.0191(0.0099) | 0.0527         | 0.0003  |
| H <sup>+</sup> -PyPH <sub>2</sub> ⋯H <sub>2</sub> CO  | 0.0129(0.0028) | 0.0543         | 0.0019  |
| H <sup>+</sup> -PyPF <sub>2</sub> ⋯H <sub>2</sub> S   | 0.0149(0.0101) | 0.0314         | 0.0000  |
| H <sup>+</sup> -PyPF <sub>2</sub> ⋯PH <sub>3</sub>    | 0.0143(0.0088) | 0.0263         | -0.0001 |
| H <sup>+</sup> -PyPF <sub>2</sub> ⋯H <sub>2</sub> O   | 0.0184(0.0099) | 0.0615         | 0.0012  |
| H <sup>+</sup> -PyPF <sub>2</sub> ⋯NH <sub>3</sub>    | 0.0393(0.0276) | 0.0581         | -0.0069 |
| H <sup>+</sup> -PyPF <sub>2</sub> ⋯H <sub>2</sub> CO  | 0.0228(0.0126) | 0.0661         | 0.0001  |
| H <sup>+</sup> -PyAsH <sub>2</sub> ⋯H <sub>2</sub> S  | 0.0120(0.0039) | 0.0299         | 0.0005  |
| H <sup>+</sup> -PyAsH <sub>2</sub> ⋯PH <sub>3</sub>   | 0.0128(0.0035) | 0.0275         | 0.0002  |
| H <sup>+</sup> -PyAsH <sub>2</sub> ⋯H <sub>2</sub> O  | 0.0145(0.0061) | 0.0553         | 0.0018  |
| H <sup>+</sup> -PyAsH <sub>2</sub> ⋯NH <sub>3</sub>   | 0.0214(0.0110) | 0.0570         | 0.0001  |
| H <sup>+</sup> -PyAsH <sub>2</sub> ⋯H <sub>2</sub> CO | 0.0145(0.0038) | 0.0570         | 0.0019  |
| H <sup>+</sup> -PyAsF <sub>2</sub> ⋯H <sub>2</sub> S  | 0.0188(0.0118) | 0.0334         | -0.0008 |
| H <sup>+</sup> -PyAsF <sub>2</sub> ⋯PH <sub>3</sub>   | 0.0193(0.0114) | 0.0281         | -0.0012 |
| H <sup>+</sup> -PyAsF <sub>2</sub> ⋯H <sub>2</sub> O  | 0.0243(0.0121) | 0.0750         | 0.0005  |
| H <sup>+</sup> -PyAsF <sub>2</sub> ⋯NH <sub>3</sub>   | 0.0470(0.0299) | 0.0683         | -0.0104 |
| H <sup>+</sup> -PyAsF <sub>2</sub> ⋯H <sub>2</sub> CO | 0.0269(0.0131) | 0.0751         | -0.0004 |

Note: Data in parentheses are the difference of electron density at the intermolecular BCP between the protonated complexes and the neutral analogues.

Table S6 Interaction energies ( $\Delta E$ , kJ/mol) of pnicogen bonds in the complexes of PyPH<sub>3</sub><sup>+</sup>

|                                                   | $\Delta E$ |
|---------------------------------------------------|------------|
| PyPH <sub>3</sub> <sup>+</sup> ⋯H <sub>2</sub> S  | -34.0      |
| PyPH <sub>3</sub> <sup>+</sup> ⋯PH <sub>3</sub>   | -37.2      |
| PyPH <sub>3</sub> <sup>+</sup> ⋯H <sub>2</sub> O  | -54.9      |
| PyPH <sub>3</sub> <sup>+</sup> ⋯NH <sub>3</sub>   | -65.5      |
| PyPH <sub>3</sub> <sup>+</sup> ⋯H <sub>2</sub> CO | -59.7      |

Table S7 Electrostatic (ES), exchange (EX), repulsion (REP), polarization (POL), and dispersion (DISP) contributions to interaction energy in the complexes. All are in kJ/mol

| System                                              | ES     | EX     | REP   | POL   | DISP  |
|-----------------------------------------------------|--------|--------|-------|-------|-------|
| H <sub>2</sub> O⋯PyPH <sub>2</sub>                  | -49.9  | -63.4  | 114.0 | -18.2 | -11.4 |
| H <sub>2</sub> O⋯PyPF <sub>2</sub>                  | -44.8  | -57.7  | 103.7 | -15.8 | -12.5 |
| H <sub>2</sub> O⋯PyAsH <sub>2</sub>                 | -50.2  | -63.5  | 114.3 | -18.5 | -11.6 |
| H <sub>2</sub> O⋯PyAsF <sub>2</sub>                 | -45.0  | -57.9  | 104.0 | -15.8 | -12.5 |
| NH <sub>3</sub> ⋯H <sup>+</sup> -PyPH <sub>2</sub>  | -122.7 | -128.4 | 247.6 | -67.3 | -19.7 |
| NH <sub>3</sub> ⋯H <sup>+</sup> -PyPF <sub>2</sub>  | -131.8 | -138.3 | 268.2 | -76.4 | -20.2 |
| NH <sub>3</sub> ⋯H <sup>+</sup> -PyAsH <sub>2</sub> | -123.0 | -128.9 | 248.6 | -67.5 | -20.0 |
| NH <sub>3</sub> ⋯H <sup>+</sup> -PyAsF <sub>2</sub> | -131.2 | -137.8 | 267.2 | -75.7 | -20.2 |

Table S8 Electron densities ( $\rho$ , au) at the intermolecular BCPs of hydrogen bonding (HB) and pnictogen bonding (ZB) in the trimers as well as their differences ( $\Delta\rho$ , au) compared to the corresponding dimers

|                                                                      | $\rho_{\text{HB}}$ | $\rho_{\text{ZB}}$ | $\Delta\rho_{\text{HB}}$ | $\Delta\rho_{\text{ZB}}$ |
|----------------------------------------------------------------------|--------------------|--------------------|--------------------------|--------------------------|
| H <sub>2</sub> O⋯PyPH <sub>2</sub> ⋯H <sub>2</sub> O                 | 0.0313             | 0.0082             | 0.0008                   | 0.0002                   |
| H <sub>2</sub> O⋯PyPF <sub>2</sub> ⋯H <sub>2</sub> O                 | 0.0287             | 0.0097             | 0.0006                   | 0.0011                   |
| H <sub>2</sub> O⋯PyAsH <sub>2</sub> ⋯H <sub>2</sub> O                | 0.0316             | 0.0089             | 0.0012                   | 0.0005                   |
| H <sub>2</sub> O⋯PyAsF <sub>2</sub> ⋯H <sub>2</sub> O                | 0.0286             | 0.0131             | 0.0004                   | 0.0009                   |
| NH <sub>3</sub> ⋯H <sup>+</sup> -PyPH <sub>2</sub> ⋯NH <sub>3</sub>  | 0.0534             | 0.0169             | -0.0032                  | -0.0021                  |
| NH <sub>3</sub> ⋯H <sup>+</sup> -PyPF <sub>2</sub> ⋯NH <sub>3</sub>  | 0.0561             | 0.0326             | -0.0050                  | -0.0067                  |
| NH <sub>3</sub> ⋯H <sup>+</sup> -PyAsH <sub>2</sub> ⋯NH <sub>3</sub> | 0.0533             | 0.0191             | -0.0035                  | -0.0023                  |
| NH <sub>3</sub> ⋯H <sup>+</sup> -PyAsF <sub>2</sub> ⋯NH <sub>3</sub> | 0.0550             | 0.0550             | -0.0058                  | -0.0055                  |



Table S9 The most positive MEP on the  $\sigma$ -hole of pnicogen atom ( $V_{\max,\sigma\text{-hole}}$ , kJ/mol) and on the positively charged proton ( $V_{\max,\text{H}}$ , kJ/mol), the most negative MEP on the nitrogen atom ( $V_{\min,\text{N}}$ , kJ/mol) in the dimers, and their differences ( $\Delta V$ , kJ/mol) compared to the isolated molecules

|                                              | $V_{\max,\sigma\text{-hole}}$ | $\Delta V_{\max,\sigma\text{-hole}}$ |                                              | $V_{\min,\text{N}}$ | $\Delta V_{\min,\text{N}}$ |
|----------------------------------------------|-------------------------------|--------------------------------------|----------------------------------------------|---------------------|----------------------------|
| $\text{H}_2\text{O}\cdots\text{PyPH}_2$      | 106.7                         | 14.6                                 | $\text{PyPH}_2\cdots\text{H}_2\text{O}$      | -164.1              | -9.2                       |
| $\text{H}_2\text{O}\cdots\text{PyPF}_2$      | 112.9                         | 9.7                                  | $\text{PyPF}_2\cdots\text{H}_2\text{O}$      | -135.3              | -3.8                       |
| $\text{H}_2\text{O}\cdots\text{PyAsH}_2$     | 108.4                         | 12.8                                 | $\text{PyAsH}_2\cdots\text{H}_2\text{O}$     | -165.8              | -11.9                      |
| $\text{H}_2\text{O}\cdots\text{PyAsF}_2$     | 125.4                         | 4.4                                  | $\text{PyAsF}_2\cdots\text{H}_2\text{O}$     | -135.2              | -2.8                       |
|                                              | $V_{\max,\sigma\text{-hole}}$ | $\Delta V_{\max,\sigma\text{-hole}}$ |                                              | $V_{\max,\text{H}}$ | $\Delta V_{\min,\text{H}}$ |
| $\text{NH}_3\cdots\text{H}^+\text{-PyPH}_2$  | 377.8                         | -34.6                                | $\text{H}^+\text{-PyPH}_2\cdots\text{NH}_3$  | 604.4               | -25.3                      |
| $\text{NH}_3\cdots\text{H}^+\text{-PyPF}_2$  | 392.1                         | -36.7                                | $\text{H}^+\text{-PyPF}_2\cdots\text{NH}_3$  | 617.9               | -37.9                      |
| $\text{NH}_3\cdots\text{H}^+\text{-PyAsH}_2$ | 380.7                         | -34.2                                | $\text{H}^+\text{-PyAsH}_2\cdots\text{NH}_3$ | 600.6               | -27.6                      |
| $\text{NH}_3\cdots\text{H}^+\text{-PyAsF}_2$ | 407.1                         | -38.5                                | $\text{H}^+\text{-PyAsF}_2\cdots\text{NH}_3$ | 606.4               | -44.1                      |

Table S10 Electrostatic (ES), polarization (POL), and dispersion (DISP) contributions to the interaction energy of hydrogen bond in the trimers. All are in kJ/mol

|                                                                  | ES            | POL           | DISP         |
|------------------------------------------------------------------|---------------|---------------|--------------|
| $\text{H}_2\text{O}\cdots\text{PyPH}_2\cdots\text{H}_2\text{O}$  | -51.7(3.6%)   | -19.1(4.9%)   | -11.2(-1.8%) |
| $\text{H}_2\text{O}\cdots\text{PyPF}_2\cdots\text{H}_2\text{O}$  | -45.6(1.8%)   | -16.3(3.2%)   | -12.4(-0.8%) |
| $\text{H}_2\text{O}\cdots\text{PyAsH}_2\cdots\text{H}_2\text{O}$ | -52.3(3.8%)   | -19.4(5.2%)   | -11.2(-2.1%) |
| $\text{H}_2\text{O}\cdots\text{PyAsF}_2\cdots\text{H}_2\text{O}$ | -45.6(1.3%)   | -16.2(2.5%)   | -12.4(-0.8%) |
| $\text{NH}_3\cdots\text{H}^+\text{-PyPH}_2\cdots\text{NH}_3$     | -116.4(-5.1%) | -61.2(-9.1%)  | -19.1(-3.0%) |
| $\text{NH}_3\cdots\text{H}^+\text{-PyPF}_2\cdots\text{NH}_3$     | -122.1(-7.4%) | -66.4(-13.1%) | -19.4(-4.0%) |
| $\text{NH}_3\cdots\text{H}^+\text{-PyAsH}_2\cdots\text{NH}_3$    | -116.0(-5.7%) | -60.8(-9.9%)  | -19.3(-3.5%) |
| $\text{NH}_3\cdots\text{H}^+\text{-PyAsF}_2\cdots\text{NH}_3$    | -119.7(-8.8%) | -64.2(-15.2%) | -19.3(-4.5%) |

Note: Data in parentheses are the increased/decreased percentage of each energy term in the trimer relative to the corresponding dimer.

Table S11 Electrostatic (ES), polarization (POL), and dispersion (DISP) contributions to the interaction energy of pnictogen bond in the trimers. All are in kJ/mol

|                                                                      | ES             | POL           | DISP          |
|----------------------------------------------------------------------|----------------|---------------|---------------|
| H <sub>2</sub> O⋯PyPH <sub>2</sub> ⋯H <sub>2</sub> O                 | -14.8(5.7%)    | -3.4(9.7%)    | -5.9(-3.3%)   |
| H <sub>2</sub> O⋯PyPF <sub>2</sub> ⋯H <sub>2</sub> O                 | -20.6(6.7%)    | -4.7(20.5%)   | -5.9(1.7%)    |
| H <sub>2</sub> O⋯PyAsH <sub>2</sub> ⋯H <sub>2</sub> O                | -16.4(13.9%)   | -4.3(19.4%)   | -6.0(-1.6%)   |
| H <sub>2</sub> O⋯PyAsF <sub>2</sub> ⋯H <sub>2</sub> O                | -37.8(4.4%)    | -8.7(10.1%)   | -7.7(1.3%)    |
| NH <sub>3</sub> ⋯H <sup>+</sup> -PyPH <sub>2</sub> ⋯NH <sub>3</sub>  | -54.0(-13.9%)  | -18.6(-19.1%) | -11.3(-9.6%)  |
| NH <sub>3</sub> ⋯H <sup>+</sup> -PyPF <sub>2</sub> ⋯NH <sub>3</sub>  | -109.4(-20.0%) | -49.4(-27.1%) | -16.3(-11.4%) |
| NH <sub>3</sub> ⋯H <sup>+</sup> -PyAsH <sub>2</sub> ⋯NH <sub>3</sub> | -65.1(-13.5%)  | -22.9(-18.2%) | -12.0(-7.7%)  |
| NH <sub>3</sub> ⋯H <sup>+</sup> -PyAsF <sub>2</sub> ⋯NH <sub>3</sub> | -159.9(-14.5%) | -76.5(-19.9%) | -17.0(1.2%)   |

Note: Data in parentheses are the increased/decreased percentage of each energy term in the trimer relative to the corresponding dimer.
